# Supplementary material for: Loss of ADAMTS3 activity causes Hennekam lymphangiectasia–lymphedema syndrome 3
Source: Oxford University Press journal article supplement (doi:10.1093/hmg/ddx297), 2017-08-01
Supplement: Figure_S1_ddx297.pdf [file Figure_S1_ddx297.pdf]

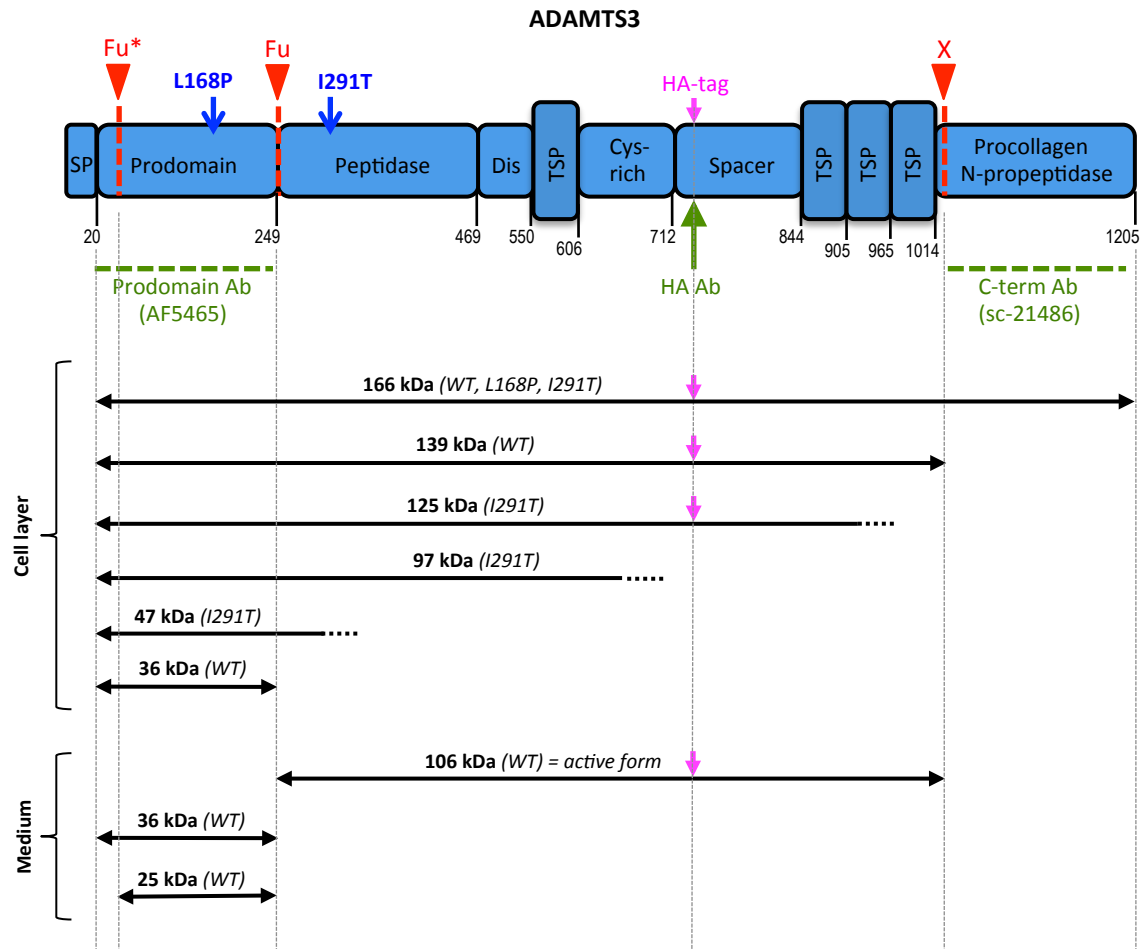

**Supplementary Figure 1.** Schematic representation of the peptides resulting from processing of ADAMTS3 in the cellular layer and released in the extracellular medium. Mutations are marked in dark blue. Position of the HA-tag (9 amino acids) is shown in magenta. The areas detected by the antibodies are indicated by green dashed lines. **Fu**, furine cleavage site; **Fu\***, likely site based on homology with ADAMTS2 (ref 18); **X**, probable autocatalytic process (ref 18); **SP**, signal peptide; **Dis**, disintegrin domain; **TSP**, thrombospondin domains.
