# Supplementary material for: Loss of ADAMTS3 activity causes Hennekam lymphangiectasia–lymphedema syndrome 3
Source: Oxford University Press journal article supplement (doi:10.1093/hmg/ddx297), 2017-08-01
Supplement: Figure_S2_ddx297.pdf [file Figure_S2_ddx297.pdf]

# **A. ADAMTS3 conditioned medium (HA-tag)**

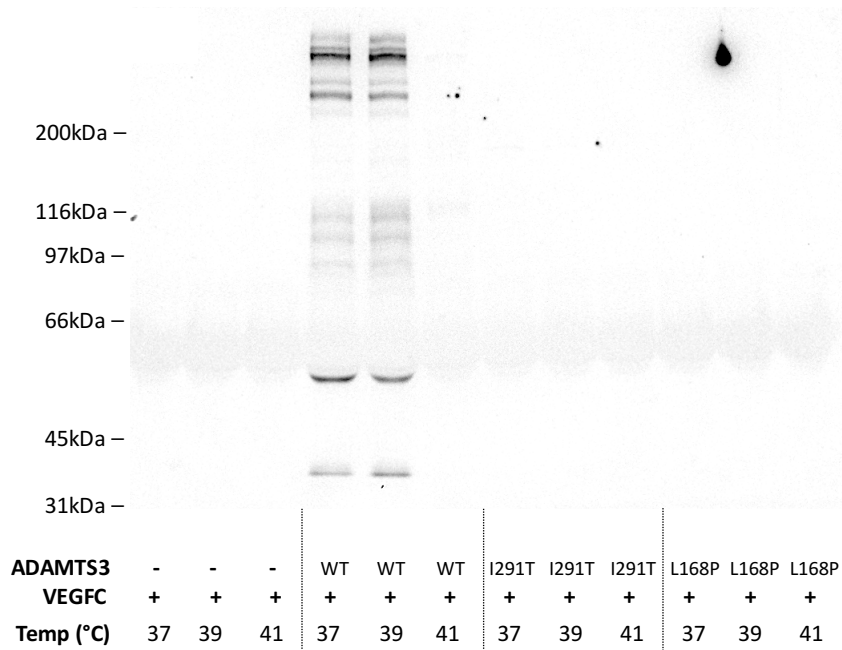

# **B.**

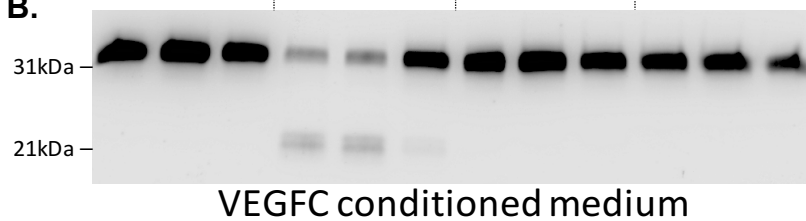

**Supplementary Figure 2.** Impact of temperature on ADAMTS3 secretion and VEGFC activation. Cells producing WT- and mutant ADAMTS3s were co-cultured with cells producing pro-VEGFC, as in Figure 3, and maintained at 37, 39 and 41°C. (A) Only WT-ADAMTS3 is detected in conditioned medium, with active form (complexed with alpha2-macroglobulin) seen above 200kDa. Increased temperatures show decreased -to almost absent- secretion of WT-ADAMTS3 at 41°C. (B) VEGFC cleavage (activation) is only observed in presence of WT-ADAMTS3-expressing cells and diminishes when temperature increases. No improvement is seen for the two ADAMTS3 mutants.
